# Supplementary material for: Changes of pro-inflammatory and anti-inflammatory macrophages after peripheral nerve injury
Source: Royal Society of Chemistry journal article supplement (doi:10.1039/d0ra06607a), 2020-01-01
Supplement: d0ra06607a2.xlsx [file d0ra06607a2.xlsx]

## Sheet: SN
M1 marker			0d	1d	4d	7d	14d
	GeneID	Symbol	log2Ratio	log2Ratio	log2Ratio	log2Ratio	log2Ratio
CD32	116591	FCGR2A	0	3.51571	3.93585	3.06361	3.19116
CCL2	24770	CCL2	0	6.35279	4.04139	2.62006	2.62372
CD86	56822	CD86	0	1.49235	2.48184	1.98982	1.96369
Nos-2 (iNOS)	24599	NOS2	0	4.11945	0.847964	1.84762	2.1244
HLA-DR	25599	CD74	0	0.302425	0.619954	0.925214	1.19298
CD197	287673	CCR7	0	3.97486	3.51893	2.91298	4.30937
HIF-1α	29560	HIF1A	0	1.80921	1.23764	0.785333	0.735734
CXCL9	246759	CXCL9	0	0.690227	0.675895	1.07331	1.71051
IL12	84405	IL12A	0	-0.917527	-2.8018	-0.181456	0.0372199
	64546	IL12B	0	7.12342	7.49068	7.2866	9.02337
IL6	24498	IL6	0	4.96144	3.65763	1.9454	0.780444
CD80	25408	CD80	0	3.51494	3.32901	2.44685	1.87641
TNF-α	24835	TNF	0	4.37732	2.64253	2.10938	2.65257
M2a marker
IGF-1	24482	IGF1	0	-0.996014	0.0890421	0.279979	0.534909
IL1RN	60582	IL1RN	0	6.51474	4.87018	5.20546	5.49665
IL-1R	25663	IL1R1	0	2.20113	1.67155	1.25783	1.12644
CD206	291327	MRC1	0	1.75715	1.58572	0.62552	0.617906
CCL17	117518	CCL17	0	8.47572	11.4659	10.7682	9.81379
Dectin-1	502902	CLEC7A	0	4.41562	5.38901	4.95517	4.75237
IL10	25325	IL10	0	10.5521	8.31737	7.17218	8.80275
DC-SIGN	288375	CD209A	0	-0.310538	-3.04281	-2.50993	-4.72735
Arg-1	29221	ARG1	0	3.5513	3.17173	1.84601	1.89063
Chil3	89824	CHI3L1	0	3.10984	0.259609	0.0300477	0.436657
M2b marker
IGF-1	24482	IGF1	0	-0.996014	0.0890421	0.279979	0.534909
CD86	56822	CD86	0	1.49235	2.48184	1.98982	1.96369
TNF-α	24835	TNF	0	4.37732	2.64253	2.10938	2.65257
CD64	295279	FCGR1A	0	4.62078	2.95333	2.09306	2.2292
VEGF	83785	VEGFA	0	-0.08716	0.426975	0.576867	0.455841
	89811	VEGFB	0	0.165947	0.182593	0.386044	-0.262736
	114111	VEGFC	0	0.719547	0.295062	0.489036	0.80627
IL10	25325	IL10	0	10.5521	8.31737	7.17218	8.80275
IL6	24498	IL6	0	4.96144	3.65763	1.9454	0.780444
M2c marker
SLAM	498286	SLAMF1	0	0.974864	1.68738	0.997867	0.727977
Sphk-1	170897	SPHK1	0	1.59414	1.39299	1.34332	-0.262799
THBS-1	445442	THBS1	0	3.57477	2.33682	1.82595	1.79253
TGF-β	59086	TGFB1	0	1.36092	1.17432	0.824287	0.921046
HMOX-1	24451	HMOX1	0	4.51492	3.31931	1.69215	1.06467
CD206	291327	MRC1	0	1.75715	1.58572	0.62552	0.617906
CD163	312701	CD163	0	1.25491	0.0319855	-0.994047	-0.843283
CXCL13	498335	CXCL13	0	1.24948	1.15381	0.795211	2.21662
IL10	25325	IL10	0	10.5521	8.31737	7.17218	8.80275
MerTK	65037	MERTK	0	0.026521	0.100372	-0.0715396	-0.0831765
Arg-1	29221	ARG1	0	3.5513	3.17173	1.84601	1.89063
M2d marker
TNF-α	24835	TNF	0	4.37732	2.64253	2.10938	2.65257
IL12	84405	IL12A	0	-0.917527	-2.8018	-0.181456	0.0372199
	64546	IL12B	0	7.12342	7.49068	7.2866	9.02337
arginase-1	29221	ARG1	0	3.5513	3.17173	1.84601	1.89063
VEGF	83785	VEGFA	0	-0.08716	0.426975	0.576867	0.455841
	89811	VEGFB	0	0.165947	0.182593	0.386044	-0.262736
	114111	VEGFC	0	0.719547	0.295062	0.489036	0.80627
IL10	25325	IL10	0	10.5521	8.31737	7.17218	8.80275
TGF-β	59086	TGFB1	0	1.36092	1.17432	0.824287	0.921046
iNOS	24599	NOS2	0	4.11945	0.847964	1.84762	2.1244
