# Supplementary material for: Changes of pro-inflammatory and anti-inflammatory macrophages after peripheral nerve injury
Source: Royal Society of Chemistry journal article supplement (doi:10.1039/d0ra06607a), 2020-01-01
Supplement: d0ra06607a3.xlsx [file d0ra06607a3.xlsx]

## Sheet: DRG
M1 marker			0h	3h	9h	1d	4d	7d
	GeneID	Symbol	log2Ratio	log2Ratio	log2Ratio	log2Ratio	log2Ratio	log2Ratio
CD32	116591	FCGR2A	0	0.465905	0.0523578	0.237346	1.54414	0.896781
CCL2	24770	CCL2	0	-0.521312	1.75384	0.788474	1.55681	1.20224
CD86	56822	CD86	0	0.0852808	-1.09419	-0.479214	0.159253	-0.153896
Nos-2 (iNOS)	24599	NOS2	0	2.05802	0.802648	-0.331315	-0.447736	1.20259
HLA-DR	25599	CD74	0	-0.310884	-0.395346	-0.15375	1.50192	2.08998
CD197	287673	CCR7	0	-1.73784	-0.0718216	-0.43085	-0.0147765	0.350147
HIF-1α	29560	HIF1A	0	0.0349447	0.0879783	0.489056	0.663706	0.508784
CXCL9	246759	CXCL9	0	-2.20509	0.675895	-1.90023	-0.617056	-0.459631
IL12	84405	IL12A	0	0.529639	-1.14803	-1.0862	0.426733	1.77517
IL6	24498	IL6	0	-0.000875821	2.73553	6.83192	6.39461	6.31593
CD80	25408	CD80	0	-1.44145	0.380691	1.35936	1.21123	1.45389
TNF-α	24835	TNF	0	-0.585838	0.131712	0.872219	0.999723	0.534571
M2a marker
IGF-1	24482	IGF1	0	0.20165	-0.397172	0.246489	0.604964	0.236378
IL1RN	60582	IL1RN	0	-0.138379	-0.338608	-0.205784	0.957903	1.01015
IL-1R	25663	IL1R1	0	0.208352	0.743059	1.15953	1.29131	1.35177
CD206	291327	MRC1	0	1.04864	0.273028	-0.0403435	0.842824	0.613125
Dectin-1	502902	CLEC7A	0	0.957704	0.0161749	0.60373	2.60242	2.79243
IL10	25325	IL10	0	-5.67312	1.51314	-5.67312	0.722189	0.0871122
DC-SIGN	288375	CD209A	0	0.999124	-3.5681	2.40565	2.13723	2.08711
Arg-1	29221	ARG1	0	-0.361278	-0.182246	2.1792	2.89829	2.62186
Chil3	89824	CHI3L1	0	0.296924	0.467867	0.900098	1.0276	1.00382
M2b marker
IGF-1	24482	IGF1	0	0.20165	-0.397172	0.246489	0.604964	0.236378
CD86	56822	CD86	0	0.0852808	-1.09419	-0.479214	0.159253	-0.153896
TNF-α	24835	TNF	0	-0.585838	0.131712	0.872219	0.999723	0.534571
CD64	295279	FCGR1A	0	-1.07554	-0.308502	-0.502495	0.539664	0.296905
VEGF	83785	VEGFA	0	0.0732912	0.0564418	-0.103429	-0.150273	-0.187671
	89811	VEGFB	0	0.0143106	-0.0756433	0.079901	-0.0198743	0.0523468
	114111	VEGFC	0	-0.499329	0.0818016	0.478354	0.200652	-0.179168
CCL1	688605	CCL1	0	8.07305	9.00211	7.67222	8.57372	7.35368
IL-10	25325	IL10	0	-5.67312	1.51314	-5.67312	0.722189	0.0871122
IL6	24498	IL6	0	-0.000875821	2.73553	6.83192	6.39461	6.31593
M2c marker
SLAM	498286	SLAMF1	0	1.24013	0.0537093	2.35221	2.26276	2.18227
Sphk-1	170897	SPHK1	0	0.296417	0.0767424	0.622143	0.133405	0.161494
THBS-1	445442	THBS1	0	-0.0239092	0.544985	1.01021	1.24164	0.788111
TGF-β	59086	TGFB1	0	-0.324573	-0.107622	-0.175075	0.232986	0.225258
HMOX-1	24451	HMOX1	0	-0.0106304	0.305792	0.140904	-0.258497	-0.250946
CD206	291327	MRC1	0	1.04864	0.273028	-0.0403435	0.842824	0.613125
CD163	312701	CD163	0	0.817146	0.858609	-0.524852	0.38614	-0.188152
CXCL13	498335	CXCL13	0	-2.68294	-1.29611	-0.313405	0.602596	0.611045
IL10	25325	IL10	0	-5.67312	1.51314	-5.67312	0.722189	0.0871122
MerTK	65037	MERTK	0	0.498113	-0.0758015	0.167362	0.073578	0.112717
Arg-1	29221	ARG1	0	-0.361278	-0.182246	2.1792	2.89829	2.62186
M2d marker
TNF-α	24835	TNF	0	-0.585838	0.131712	0.872219	0.999723	0.534571
IL12	84405	IL12A	0	0.529639	-1.14803	-1.0862	0.426733	1.77517
arginase-1	29221	ARG1	0	-0.361278	-0.182246	2.1792	2.89829	2.62186
VEGF	83785	VEGFA	0	0.0732912	0.0564418	-0.103429	-0.150273	-0.187671
	89811	VEGFB	0	0.0143106	-0.0756433	0.079901	-0.0198743	0.0523468
	114111	VEGFC	0	-0.499329	0.0818016	0.478354	0.200652	-0.179168
IL-10	25325	IL10	0	-5.67312	1.51314	-5.67312	0.722189	0.0871122
TGF-β	59086	TGFB1	0	-0.324573	-0.107622	-0.175075	0.232986	0.225258
iNOS	24599	NOS2	0	2.05802	0.802648	-0.331315	-0.447736	1.20259
